# Supplementary figures and images for: Characterizing the distribution of organic matter during composting of sewage sludge using a chemical and spectroscopic approach
Source: Royal Society of Chemistry journal article supplement (doi:10.1039/c5ra16050b), 2015-01-01

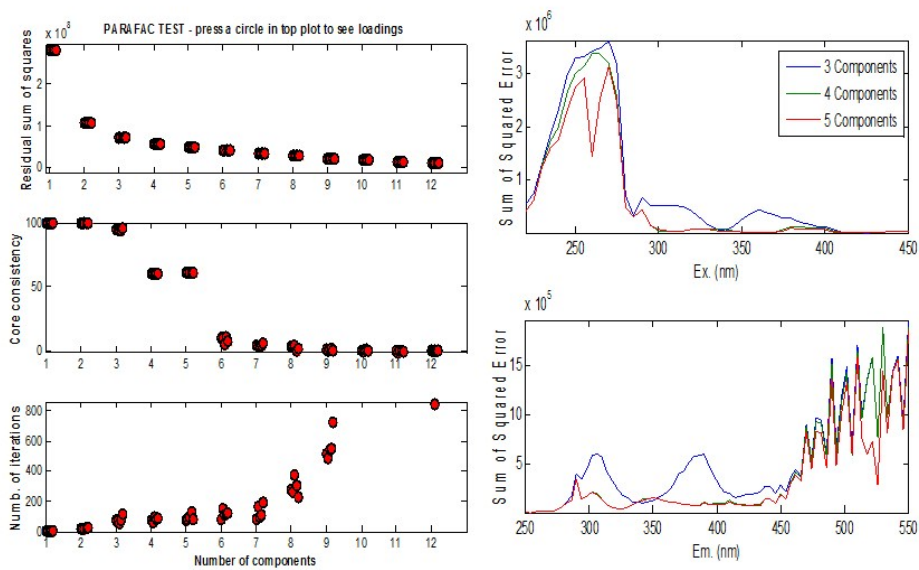

Fig. 1 Results of core consistency and sum of squared error

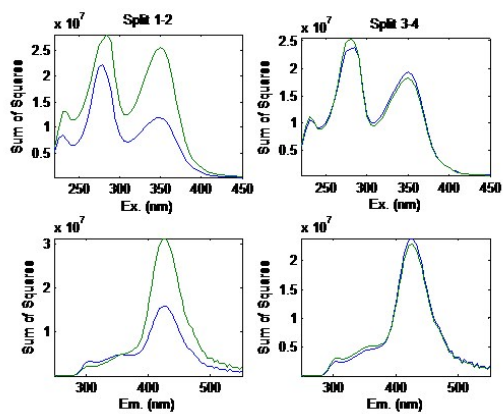

Fig. 2 Results of split half analysis

Supplement: c5ra16050b1.pdf [file c5ra16050b1.pdf]
